# Supplementary material for: Temperature effect on seawater ƒCO 2 revisited: theoretical basis, uncertainty analysis, and implications for parameterising carbonic acid equilibrium constants
Source: Copernicus journal article supplement (doi:10.5194/egusphere-2024-626), 2024-03-05
Supplement: Supplementary file 1 [file egusphere-2024-626-supplement.pdf]

# ***Supplementary Information for Temperature effect on seawater $f\text{CO}_2$ revisited: theoretical basis, uncertainty analysis, and implications for parameterising carbonic acid equilibrium constants***

Matthew P. Humphreys

5 Department of Ocean Sciences, NIOZ Royal Netherlands Institute for Sea Research, PO Box 59, 1790 AB Den Burg (Texel), the Netherlands

*Correspondence to:* Matthew P. Humphreys (matthew.humphreys@nioz.nl)

10 **Supplementary Table 1: Best-fit coefficients for the parameterisation of  $b_h$  in Eq. (35).**

| Coefficient | Value        | Unit                                                               |
|-------------|--------------|--------------------------------------------------------------------|
| $u_0$       | 31318.4      | $\text{J mol}^{-1}$                                                |
| $u_1$       | 139.488      | $\text{J mol}^{-1} \text{ }^\circ\text{C}^{-1}$                    |
| $u_2$       | -1.21088     | $\text{J mol}^{-1}$                                                |
| $u_3$       | -4.22484     | $\text{J mol}^{-1} \mu\text{atm}^{-1}$                             |
| $u_4$       | -0.652212    | $\text{J mol}^{-1} \text{ }^\circ\text{C}^{-2}$                    |
| $u_5$       | -16.9522     | $\text{J mol}^{-1}$                                                |
| $u_6$       | -0.000547593 | $\text{J mol}^{-1} \mu\text{atm}^{-2}$                             |
| $u_7$       | -3.02072     | $\text{J mol}^{-1} \text{ }^\circ\text{C}^{-1}$                    |
| $u_8$       | 0.166973     | $\text{J mol}^{-1} \text{ }^\circ\text{C}^{-1} \mu\text{atm}^{-1}$ |
| $u_9$       | 0.309654     | $\text{J mol}^{-1} \mu\text{atm}^{-1}$                             |

15

**Supplementary Table 2: The variance-covariance matrix for uncertainty propagation for the best-fit coefficients (Supp. Table 1) of the  $b_h$  parameterisation in Eq. (35). The main diagonal gives the variance for each coefficient while the off-diagonal values represent the covariances. The units are consistent with Supp. Table 1.**

|       | $u_0$                 | $u_1$                 | $u_2$                 | $u_3$                 | $u_4$                 | $u_5$                 | $u_6$                  | $u_7$                 | $u_8$                 | $u_9$                  |
|-------|-----------------------|-----------------------|-----------------------|-----------------------|-----------------------|-----------------------|------------------------|-----------------------|-----------------------|------------------------|
| $u_0$ | 28.8                  | $2.13 \cdot 10^{-1}$  | $5.77 \cdot 10^{-4}$  | $-8.22 \cdot 10^{-1}$ | $3.60 \cdot 10^{-3}$  | $-9.96 \cdot 10^{-2}$ | $6.24 \cdot 10^{-5}$   | $-1.36 \cdot 10^{-3}$ | $-5.29 \cdot 10^{-4}$ | $1.87 \cdot 10^{-3}$   |
| $u_1$ | $2.13 \cdot 10^{-1}$  | $1.21 \cdot 10^{-2}$  | $1.51 \cdot 10^{-5}$  | $-5.34 \cdot 10^{-3}$ | $6.73 \cdot 10^{-5}$  | $-1.15 \cdot 10^{-3}$ | $1.35 \cdot 10^{-6}$   | $-2.40 \cdot 10^{-4}$ | $-1.21 \cdot 10^{-5}$ | $1.09 \cdot 10^{-5}$   |
| $u_2$ | $5.77 \cdot 10^{-4}$  | $1.51 \cdot 10^{-5}$  | $3.79 \cdot 10^{-7}$  | $-1.87 \cdot 10^{-5}$ | $3.66 \cdot 10^{-7}$  | $-2.77 \cdot 10^{-6}$ | $3.95 \cdot 10^{-9}$   | $-2.73 \cdot 10^{-7}$ | $-4.71 \cdot 10^{-8}$ | $1.29 \cdot 10^{-8}$   |
| $u_3$ | $-8.22 \cdot 10^{-1}$ | $-5.34 \cdot 10^{-3}$ | $-1.87 \cdot 10^{-5}$ | $4.05 \cdot 10^{-2}$  | $-3.93 \cdot 10^{-4}$ | $1.34 \cdot 10^{-3}$  | $6.32 \cdot 10^{-7}$   | $1.37 \cdot 10^{-4}$  | $4.13 \cdot 10^{-6}$  | $-5.46 \cdot 10^{-5}$  |
| $u_4$ | $3.60 \cdot 10^{-3}$  | $6.73 \cdot 10^{-5}$  | $3.66 \cdot 10^{-7}$  | $-3.93 \cdot 10^{-4}$ | $8.61 \cdot 10^{-6}$  | $8.56 \cdot 10^{-6}$  | $-3.99 \cdot 10^{-9}$  | $-3.35 \cdot 10^{-6}$ | $9.37 \cdot 10^{-8}$  | $-2.22 \cdot 10^{-7}$  |
| $u_5$ | $-9.96 \cdot 10^{-2}$ | $-1.15 \cdot 10^{-3}$ | $-2.77 \cdot 10^{-6}$ | $1.34 \cdot 10^{-3}$  | $8.56 \cdot 10^{-6}$  | $5.00 \cdot 10^{-4}$  | $-4.88 \cdot 10^{-7}$  | $3.40 \cdot 10^{-6}$  | $3.17 \cdot 10^{-6}$  | $-5.97 \cdot 10^{-6}$  |
| $u_6$ | $6.24 \cdot 10^{-5}$  | $1.35 \cdot 10^{-6}$  | $3.95 \cdot 10^{-9}$  | $6.32 \cdot 10^{-7}$  | $-3.99 \cdot 10^{-9}$ | $-4.88 \cdot 10^{-7}$ | $8.00 \cdot 10^{-10}$  | $-2.01 \cdot 10^{-9}$ | $-3.95 \cdot 10^{-9}$ | $-5.58 \cdot 10^{-10}$ |
| $u_7$ | $-1.36 \cdot 10^{-3}$ | $-2.40 \cdot 10^{-4}$ | $-2.73 \cdot 10^{-7}$ | $1.37 \cdot 10^{-4}$  | $-3.35 \cdot 10^{-6}$ | $3.40 \cdot 10^{-6}$  | $-2.01 \cdot 10^{-9}$  | $7.94 \cdot 10^{-6}$  | $-6.71 \cdot 10^{-8}$ | $-3.51 \cdot 10^{-8}$  |
| $u_8$ | $-5.29 \cdot 10^{-4}$ | $-1.21 \cdot 10^{-5}$ | $-4.71 \cdot 10^{-8}$ | $4.13 \cdot 10^{-6}$  | $9.37 \cdot 10^{-8}$  | $3.17 \cdot 10^{-6}$  | $-3.95 \cdot 10^{-9}$  | $-6.71 \cdot 10^{-8}$ | $4.47 \cdot 10^{-8}$  | $-2.94 \cdot 10^{-8}$  |
| $u_9$ | $1.87 \cdot 10^{-3}$  | $1.09 \cdot 10^{-5}$  | $1.29 \cdot 10^{-8}$  | $-5.46 \cdot 10^{-5}$ | $-2.22 \cdot 10^{-7}$ | $-5.97 \cdot 10^{-6}$ | $-5.58 \cdot 10^{-10}$ | $-3.51 \cdot 10^{-8}$ | $-2.94 \cdot 10^{-8}$ | $2.03 \cdot 10^{-7}$   |

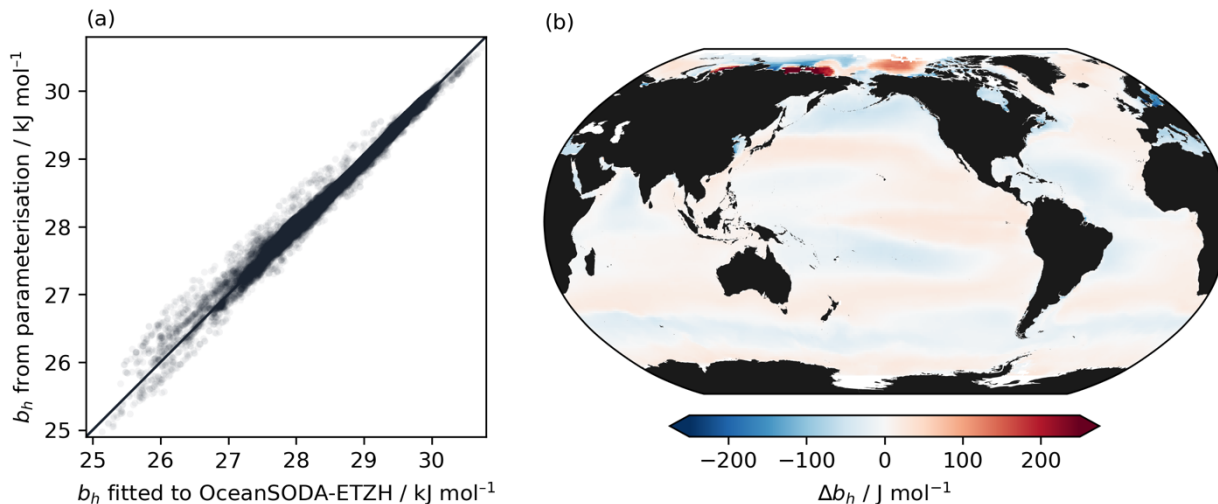

20

**Supplementary Figure 1: Comparisons between  $b_h$  fitted to the OceanSODA-ETZH dataset and the  $b_h$  values returned from the parameterisation in Eq. (35) with the coefficients from Supp. Table 1. (a) All monthly mean data, with the ideal 1:1 relationship shown as a solid black line. (b) Spatial distribution of residuals between the parameterisation and the fitted values of  $b_h$ , averaged across all months.**

25

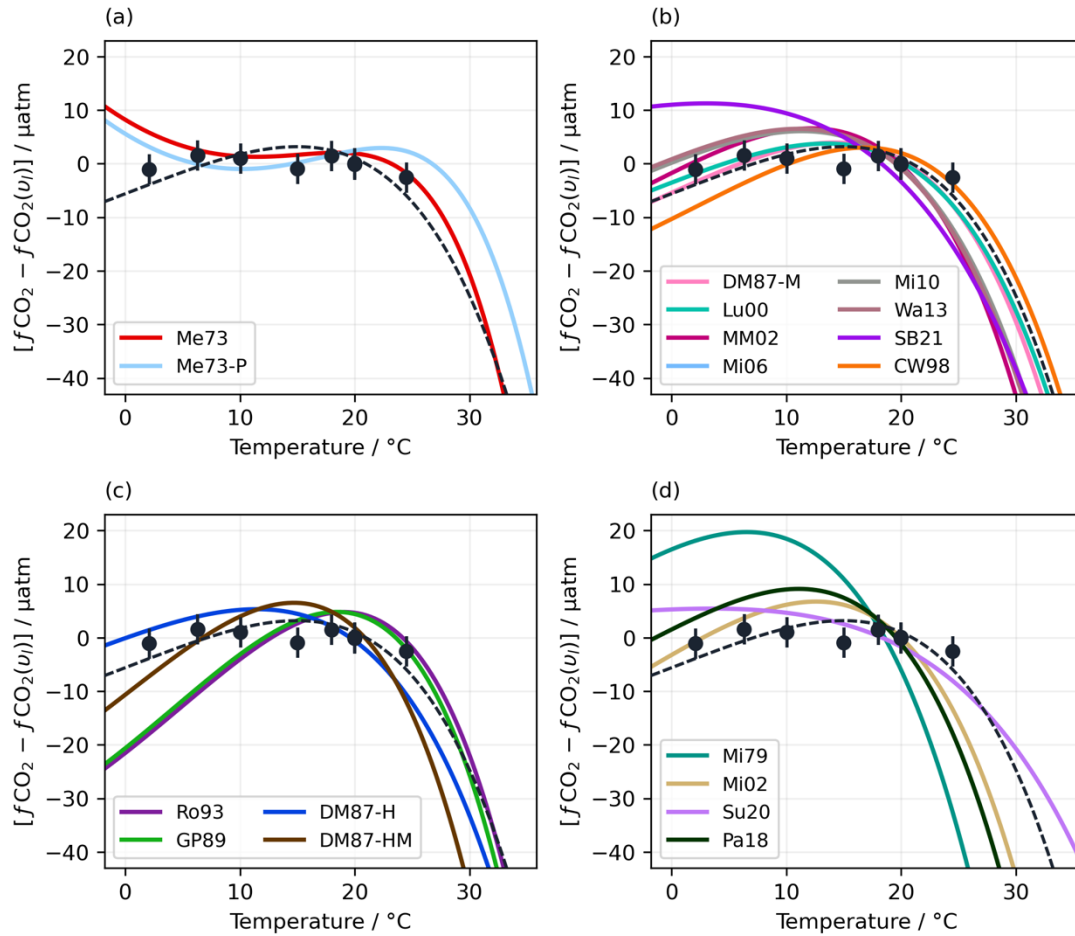

Supplementary Figure 2: Variation of  $f\text{CO}_2$  with temperature according to the measurements of Takahashi et al. (1993) (Ta93; filled circles with vertical  $1\sigma$  error bars) and the different theoretical values of  $v$  calculated from  $A_T$  and  $T_C$  for all of the carbonic acid parameterisations in PyCO2SYS, all normalised to the linear fit ( $v_l$ ) and computed under the conditions of the Takahashi et al. (1993) experiment (Sect. 2.1.2). The citations for the codes for the different carbonic acid parameterisations in the panel legends can be found in the caption of Fig. 6. With reference to Fig. 6, (a) here shows the “GEOSECS” options, (b) the “Mehrbach” options, (c) the “Synthetic” options, and (d) the others. The dark dashed line shows the best fit of Eq. (19) to the Takahashi et al. (1993) dataset (i.e.,  $v_h$ ), as in Fig. 1a.

30

35

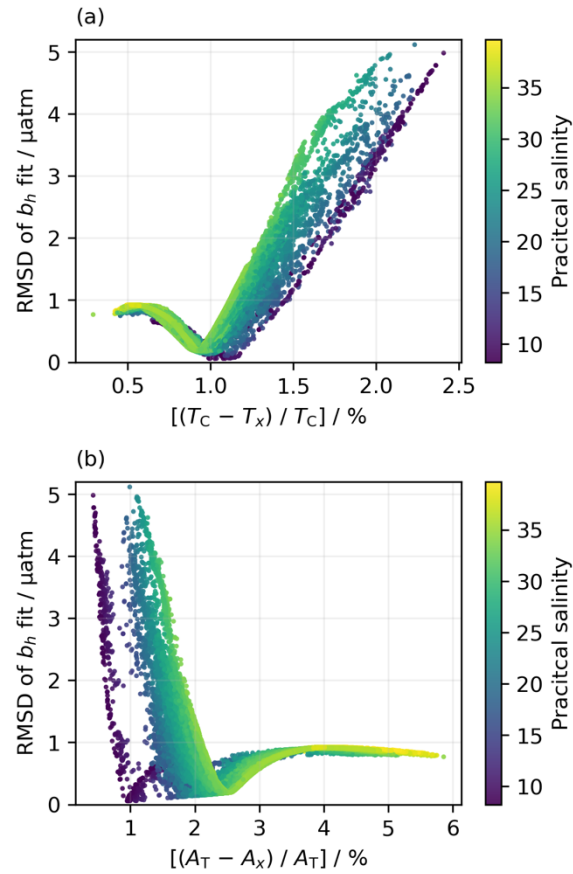

**Supplementary Figure 3: Variation of the RMSD of the residuals in the  $b_h$  fit (in terms of  $f\text{CO}_2$ , as shown in Fig. 3a) with (a) the relative error in the  $T_x$  approximation (Eq. 13), and (b) the relative error in the  $A_x$  approximation (Eq. 12), both coloured by practical salinity.**

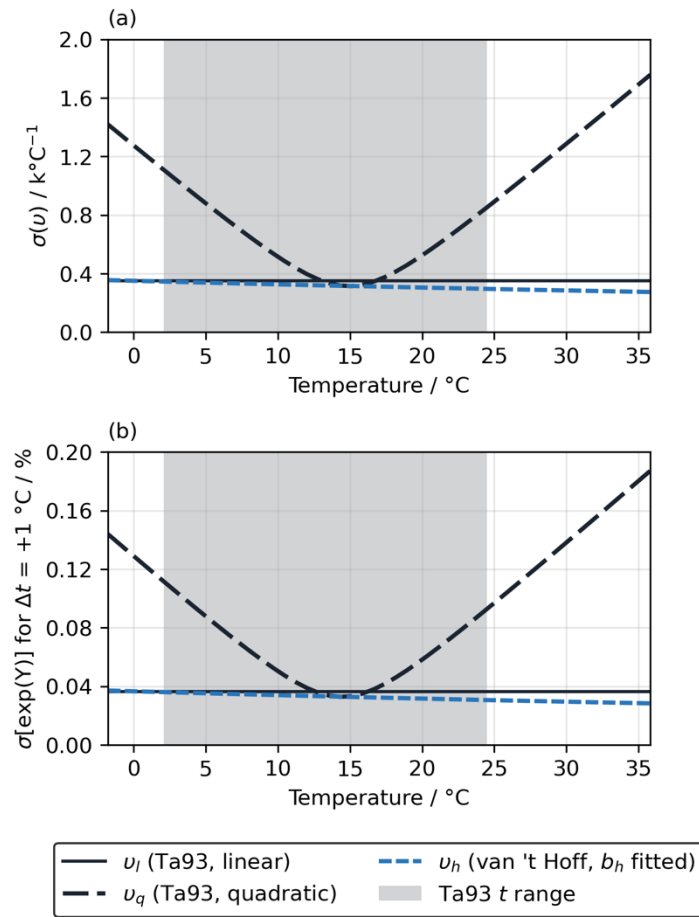

40

Supplementary Figure 4. (a)  $1\sigma$  uncertainty in  $v$  due to experimental uncertainties in  $t$  and  $f\text{CO}_2$  in the Takahashi et al. (1993) dataset only and fitted with the linear (dotted line; Eq. 5) and quadratic (dashed line; Eq. 6) forms as well as the fitted van 't Hoff form (solid line; Eq. 19). The shaded area shows the range of  $t$  from the Takahashi et al. (1993) experiment, while the full  $t$  axis range matches OceanSODA-ETZH. (b) Equivalent for  $\exp(Y)$  for  $\Delta t = +1 \text{ }^\circ\text{C}$ , i.e., identical to Fig. 4.

45
